# Supplementary material for: The MADS-box transcription factor PHERES1 controls imprinting in the endosperm by binding to domesticated transposons
Source: eLife. 2019 Dec 2;8:e50541. doi: 10.7554/eLife.50541 (PMC6914339; doi:10.7554/eLife.50541)
Supplement: Figure 1—source data 1. [file elife-50541-fig1-data1.xlsx]

## Sheet: Sheet1
Figure 1 - Source Data 1. PHE1 target genes and their respective endosperm expression cluster (Fig. 1c).
ID	Expression cluster
AT4G03270	2
AT1G56580	2
AT5G48175	3
AT1G68552	NA
AT3G22380	2
AT1G76880	2
AT4G02080	2
AT1G26620	1
AT4G29780	2
AT5G67470	2
AT5G57480	2
AT4G04957	NA
AT1G06980	3
AT1G23050	2
AT2G32360	1
AT1G42490	NA
AT5G07440	3
AT3G22810	3
AT3G01480	3
AT5G06060	2
AT1G65875	NA
AT4G04600	3
AT4G20290	2
AT2G42580	3
AT1G31160	2
AT2G22300	3
AT1G68530	2
AT2G02520	3
AT5G47020	2
AT1G71900	3
AT5G44480	2
AT4G09540	3
AT5G28830	NA
AT1G19040	3
AT1G63700	2
AT4G29790	3
AT2G10535	NA
AT1G72500	3
AT1G34160	3
AT3G29360	3
AT2G24530	3
AT4G04450	2
AT5G47900	3
AT1G52320	2
AT3G11600	2
AT4G18820	2
AT4G14470	3
AT3G04070	2
AT2G25120	NA
AT2G22482	NA
AT2G28890	2
AT1G22120	NA
AT1G64140	2
AT1G68740	3
AT5G11970	2
AT5G40330	3
AT2G41900	3
AT1G63560	3
AT3G11310	NA
AT1G69080	3
AT3G23380	NA
AT1G43200	3
AT4G37080	2
AT2G24696	NA
AT2G23740	3
AT1G61340	3
AT1G73680	1
AT5G17720	3
AT5G11660	NA
AT2G01180	3
AT5G22990	3
AT4G39600	NA
AT3G45577	NA
AT4G08510	NA
AT3G50040	NA
AT2G35060	3
AT2G04240	2
AT2G28340	NA
AT1G74340	3
AT3G14300	3
AT5G19400	3
AT1G65320	NA
AT5G01820	2
AT5G18650	3
AT1G74750	3
AT3G55270	3
AT2G19460	3
AT5G08360	2
AT1G63490	2
AT4G25640	2
AT4G02790	3
AT1G15110	2
AT5G47160	2
AT4G12370	NA
AT1G15690	3
AT1G64880	3
AT1G65360	3
AT3G27950	3
AT5G03600	3
AT1G62975	NA
AT3G03910	1
AT5G08350	2
AT1G12000	3
AT4G32030	3
AT4G37260	3
AT5G54350	1
AT1G71010	2
AT1G12080	2
AT4G28720	3
AT3G16400	3
AT5G01170	NA
AT1G48870	3
AT1G75620	3
AT1G52390	3
AT5G06510	3
AT2G26120	3
AT2G17305	NA
AT1G31830	2
AT4G09100	3
AT2G41490	3
AT1G68500	3
AT2G04280	2
AT5G28400	3
AT1G10717	NA
AT3G07270	1
AT2G19390	3
AT5G27000	3
AT5G56367	NA
AT3G23167	NA
AT2G46430	3
AT2G30470	2
AT2G11850	NA
AT4G07521	NA
AT2G38400	1
AT1G70520	3
AT5G56270	3
AT3G56370	2
AT4G18010	3
AT5G45990	3
AT4G09153	NA
AT1G56423	NA
AT2G40210	1
AT1G31640	2
AT5G22950	3
AT2G27690	2
AT5G39995	NA
AT3G11760	2
AT5G21940	NA
AT4G36670	3
AT1G25440	NA
AT2G21235	NA
AT4G02487	NA
AT3G10116	NA
AT2G40030	2
AT4G23720	3
AT3G53620	2
AT4G36520	NA
AT3G27960	1
AT5G23460	2
AT5G04500	3
AT2G24430	3
AT1G17770	1
AT4G03110	2
AT5G15490	2
AT5G11740	2
AT5G23290	3
AT5G42950	3
AT4G15750	1
AT1G02980	1
AT5G39440	1
AT5G55690	NA
AT2G02480	2
AT2G36560	3
AT1G31630	3
AT5G57040	2
AT3G23060	1
AT4G08990	3
AT1G49780	3
AT5G41320	3
AT5G35610	NA
AT2G28690	3
AT2G20050	2
AT4G30580	3
AT2G25180	2
AT1G22220	NA
AT5G59350	3
AT3G05320	2
AT2G26950	3
AT1G79510	3
AT4G20050	1
AT3G14205	3
AT2G33290	3
AT2G16860	3
AT5G62220	2
AT5G53144	NA
AT2G03580	3
AT1G60410	NA
AT3G28715	3
AT1G50040	3
AT3G01350	3
AT3G06770	3
AT3G45252	NA
AT1G61688	NA
AT1G66620	3
AT1G51330	NA
AT5G47820	3
AT4G30110	2
AT2G44925	NA
AT3G44310	3
AT3G28670	2
AT4G27950	NA
AT5G61090	3
AT1G36200	NA
AT5G07680	2
AT4G37680	3
AT5G65575	3
AT3G52930	3
AT5G49570	2
AT1G07135	NA
AT1G21920	3
AT3G45200	NA
AT4G02670	3
AT4G00124	NA
AT3G15990	3
AT5G03140	3
AT3G30775	2
AT4G36970	3
AT1G56400	NA
AT5G41080	3
AT2G46700	2
AT5G61997	NA
AT5G10960	3
AT2G11190	3
AT2G31271	NA
AT2G39435	NA
AT1G80020	3
AT4G35230	3
AT2G03500	3
AT4G14140	3
AT3G19290	3
AT4G22820	3
AT5G58530	3
AT2G41960	3
AT3G18550	NA
AT5G23260	3
AT1G74330	3
AT1G13700	1
AT5G25955	NA
AT4G14760	3
AT1G17744	NA
AT5G27880	NA
AT1G54940	3
AT5G04770	3
AT1G22100	NA
AT5G55660	3
AT1G10747	NA
AT5G27070	NA
AT1G68400	2
AT1G08592	NA
AT2G20290	3
AT2G21465	NA
AT1G21670	3
AT2G03490	NA
AT3G25890	2
AT2G31780	1
AT1G70140	2
AT2G47150	3
AT4G36920	3
AT2G21130	3
AT4G09070	NA
AT5G53592	NA
AT3G13710	2
AT3G44810	NA
AT5G03020	3
AT2G03932	NA
AT3G28850	1
AT1G63720	3
AT1G26590	1
AT1G24570	NA
AT1G33770	3
AT1G73460	2
AT3G54550	NA
AT4G16650	2
AT1G21490	NA
AT1G04445	NA
AT1G18075	NA
AT4G39070	3
AT2G33360	2
AT1G62870	NA
AT4G01525	NA
AT2G35890	1
AT5G17300	3
AT4G36780	2
AT3G15340	NA
AT5G19140	2
AT3G48190	2
AT5G07280	2
AT2G23870	NA
AT3G56520	3
AT1G69252	NA
AT3G43660	3
AT4G13395	NA
AT4G24050	3
AT1G71360	NA
AT2G16405	NA
AT2G01667	NA
AT5G45480	3
AT1G64870	NA
AT5G42940	3
AT3G15880	3
AT1G43850	2
AT1G19450	2
AT4G10220	1
AT2G29940	3
AT1G52750	NA
AT3G23530	1
AT4G02780	1
AT1G69040	3
AT2G19800	1
AT5G53550	2
AT5G11220	2
AT3G52910	NA
AT3G19970	1
AT5G61290	3
AT5G55540	2
AT3G61580	3
AT4G36220	2
AT1G11210	3
AT2G03933	NA
AT5G10040	3
AT3G56277	NA
AT5G60920	2
AT5G10660	1
AT3G21170	2
AT2G46690	2
AT3G60400	2
AT5G07350	NA
AT4G39330	3
AT5G07830	3
AT1G12210	3
AT3G52020	2
AT1G03060	2
AT3G60350	2
AT3G49350	3
AT5G20440	1
AT1G03470	3
AT1G12600	2
AT3G07130	2
AT1G32850	3
AT5G03330	NA
AT3G43990	1
AT3G26100	2
AT1G71020	3
AT4G20790	3
AT4G23490	2
AT2G01820	3
AT2G46940	3
AT1G31120	3
AT3G48950	1
AT5G67300	2
AT1G49770	NA
AT2G20300	2
AT1G70750	1
AT5G52850	3
AT2G24740	1
AT3G23590	2
AT3G02660	3
AT3G60280	3
AT1G70770	3
AT1G13260	3
AT5G63990	1
AT2G31360	3
AT1G27690	2
AT5G19090	2
AT1G55600	1
AT1G75770	3
AT1G72000	1
AT1G11950	3
AT3G20300	3
AT5G04830	2
AT1G12010	2
AT5G28664	NA
AT4G11920	2
AT2G24360	2
AT4G19035	NA
AT5G40840	3
AT4G35470	2
AT1G32090	1
AT2G37630	3
AT2G46270	2
AT3G54310	3
AT1G78710	1
AT1G51290	1
AT5G65670	2
AT3G11150	3
AT1G79970	3
AT5G35240	3
AT5G65510	2
AT5G48960	3
AT4G02480	3
AT4G23110	2
AT3G49796	NA
AT1G03445	1
AT2G42100	1
AT5G35100	3
AT5G48820	3
AT5G35890	2
AT5G59210	3
AT4G34588	NA
AT5G54800	2
AT5G53290	3
AT5G18420	3
AT1G64950	NA
AT3G57390	2
AT3G11520	2
AT1G29010	NA
AT3G59790	3
AT1G71960	2
AT2G03937	NA
AT4G30210	3
AT5G35339	NA
AT3G28490	1
AT1G61160	3
AT2G48030	3
AT4G30160	3
AT1G07680	3
AT3G17860	2
AT4G23496	3
AT1G58100	3
AT2G31570	1
AT3G06490	3
AT3G14000	2
AT2G16250	3
AT2G15340	1
AT5G06680	2
AT5G17230	2
AT5G25240	2
AT3G03260	1
AT1G11070	3
AT5G59220	2
AT4G33080	2
AT2G24760	NA
AT1G72770	3
AT5G35900	1
AT3G61175	NA
AT3G05460	1
AT1G06030	1
AT2G23520	NA
AT5G46040	1
AT4G30090	3
AT2G40540	2
AT1G10200	2
AT3G14220	2
AT4G12250	3
AT1G64390	2
AT4G15720	3
AT2G37200	NA
AT5G66320	2
AT1G07670	3
AT2G36325	NA
AT2G32340	3
AT1G19950	3
AT1G76550	3
AT5G51105	NA
AT5G63780	3
AT2G42830	3
AT5G37790	2
AT3G54710	NA
AT5G58550	3
AT5G10890	NA
AT5G11310	3
AT1G76180	2
AT1G49620	3
AT3G54950	2
AT3G60790	3
AT2G47900	2
AT3G06260	3
AT5G46740	3
AT3G14475	NA
AT3G61660	NA
AT3G51850	2
AT5G17847	NA
AT4G14661	NA
AT4G15417	NA
AT1G76900	3
AT4G10150	3
AT2G23990	1
AT3G03760	NA
AT1G13390	NA
AT3G24180	2
AT3G18080	3
AT5G57630	3
AT3G56800	3
AT3G61590	2
AT1G12240	2
AT4G26030	NA
AT1G22590	2
AT3G05545	NA
AT4G32920	2
AT4G37670	3
AT1G28630	2
AT2G02830	3
AT1G67270	3
AT4G19700	3
AT4G32850	2
AT5G65300	3
AT1G55360	2
AT4G26630	3
AT1G76600	3
AT1G31940	2
AT1G59500	1
AT5G27810	3
AT5G26250	1
AT1G22420	3
AT5G20830	2
AT5G63490	3
AT1G65930	3
AT5G66710	3
AT4G24400	2
AT5G09420	3
AT5G35995	NA
AT4G35985	1
AT5G67180	3
AT5G64030	2
AT2G03470	3
AT4G30590	2
AT1G20620	2
AT1G68440	3
AT1G51230	NA
AT2G18700	3
AT1G76260	2
AT4G37740	2
AT3G14820	3
AT3G17152	NA
AT5G01280	3
AT1G13940	2
AT4G08263	NA
AT3G45245	NA
AT3G14350	2
AT1G20360	NA
AT3G24060	1
AT1G51680	3
AT3G24790	1
AT2G42650	NA
AT1G01570	1
AT1G30240	3
AT4G10603	NA
AT5G42110	3
AT3G54650	3
AT3G43505	NA
AT2G38010	3
AT4G16760	1
AT1G08010	3
AT5G53610	NA
AT4G23740	2
AT3G45240	2
AT5G50480	3
AT5G23570	2
AT5G04860	3
AT1G63220	1
AT2G27930	NA
AT4G35070	2
AT1G08570	2
AT2G24810	3
AT4G21480	3
AT3G16150	3
AT2G47030	2
AT2G14890	2
AT1G77525	NA
AT3G05860	1
AT3G60130	2
AT1G53210	3
AT3G45555	NA
AT3G24220	3
AT3G18690	3
AT1G31040	3
AT3G20950	3
AT5G56260	2
AT2G46000	3
AT4G28600	3
AT1G59650	3
AT5G60710	3
AT3G05310	1
AT1G55550	3
AT2G02147	NA
AT1G69640	3
AT1G28050	3
AT2G18490	3
AT3G48000	2
AT5G41180	3
AT1G75760	2
AT1G50760	3
AT1G18130	3
AT5G05140	3
AT5G05260	1
AT1G78510	2
AT4G17505	1
AT1G65840	3
AT1G07750	2
AT4G20880	2
AT5G06150	3
AT5G48230	3
AT1G32760	3
AT5G24316	3
AT3G55950	3
AT5G40390	2
AT2G41290	3
AT1G68580	3
AT3G16860	3
AT1G79150	3
AT3G29152	NA
AT4G29285	1
AT1G25220	3
AT2G25685	NA
AT3G11100	3
AT1G24130	NA
AT4G35890	3
AT5G62560	NA
AT1G49290	1
AT4G07747	NA
AT5G13600	2
AT2G30020	2
AT3G16857	2
AT4G19905	NA
AT3G61290	NA
AT4G26490	2
AT4G20200	1
AT1G09510	3
AT1G32180	1
AT5G25950	3
AT1G64290	3
AT4G14350	3
AT1G15400	2
AT1G78200	3
AT5G04250	3
AT4G20830	1
AT2G43430	3
AT2G36390	2
AT1G77740	3
AT1G15490	2
AT1G11540	3
AT2G39210	1
AT5G01860	3
AT5G53460	3
AT4G27350	2
AT1G80700	2
AT2G14793	NA
AT2G44980	2
AT3G54810	2
AT1G19440	2
AT3G17090	3
AT4G28700	1
AT5G02880	2
AT5G16440	3
AT4G30770	3
AT4G18910	3
AT5G52140	1
AT5G26960	2
AT5G27900	NA
AT2G19802	NA
AT4G23520	1
AT4G34970	3
AT2G27920	1
AT1G33740	NA
AT1G67775	NA
AT3G22200	3
AT1G08630	3
AT2G26940	1
AT3G62060	3
AT3G13530	3
AT2G29140	3
AT3G14090	2
AT4G10160	3
AT3G05975	NA
AT3G46590	2
AT1G10280	NA
AT1G04440	3
AT5G33340	3
AT3G19820	2
AT1G13605	NA
AT5G40730	3
AT4G21790	3
AT2G01190	2
AT2G23970	1
AT2G36910	2
AT5G02500	2
AT4G10595	NA
AT5G23790	3
AT5G24390	2
AT3G26910	3
AT5G39710	3
AT4G00300	2
AT1G31510	3
AT1G61890	2
AT5G14230	2
AT4G31895	NA
AT2G04750	1
AT1G62960	3
AT4G08028	NA
AT3G17920	3
AT5G20250	1
AT5G19700	3
AT5G03180	3
AT1G26600	3
AT5G38200	NA
AT2G23260	2
AT4G01500	3
AT1G04680	2
AT1G27850	3
AT1G17710	3
AT1G33420	2
AT4G39850	3
AT1G18730	3
AT2G03190	1
AT4G22060	NA
AT3G61610	2
AT1G10780	3
AT1G24170	3
AT3G11740	3
AT2G32370	1
AT4G11940	3
AT5G10190	3
AT2G33120	3
AT1G11362	NA
AT5G01520	2
AT5G59050	2
AT1G75220	3
AT3G10310	2
AT1G53110	3
AT2G28370	2
AT4G19200	3
AT1G73360	3
AT5G12840	3
AT5G04540	3
AT4G33830	1
AT3G55740	1
AT5G63760	3
AT5G23870	1
AT2G33550	NA
AT1G10680	1
AT5G41580	2
AT4G39490	3
AT3G61180	3
AT5G47390	3
AT2G26740	3
AT4G39980	3
AT5G11650	2
AT4G17460	3
AT2G01850	3
AT1G69060	NA
AT3G61172	NA
AT1G19880	3
AT2G15660	3
AT5G09370	1
AT1G72080	3
AT4G01330	3
AT5G09462	NA
AT3G02890	2
AT4G27890	1
AT1G04310	2
AT2G24880	3
AT2G18230	2
AT1G32060	3
AT5G58830	1
AT5G50450	3
AT4G28703	3
AT5G41250	3
AT1G70780	3
AT1G14110	3
AT2G44690	3
AT1G53035	2
AT3G60030	2
AT4G36820	NA
AT1G26610	1
AT1G73550	NA
AT1G77210	1
AT3G42473	NA
AT3G59480	3
AT1G71697	2
AT3G45150	NA
AT2G35743	NA
AT5G23650	1
AT1G17340	3
AT2G28680	1
AT5G18320	NA
AT2G35250	NA
AT2G19450	2
AT5G46540	1
AT2G10537	NA
AT5G40260	1
AT1G12420	NA
AT5G53560	3
AT3G56275	NA
AT2G15740	3
AT1G29900	3
AT3G30842	NA
AT1G06450	2
AT3G46310	NA
AT3G55260	2
AT1G44090	1
AT1G79180	3
AT5G09340	3
AT5G43830	2
AT5G05030	3
AT1G25550	3
AT5G55700	3
AT3G14940	1
AT5G40870	3
AT3G10300	3
AT5G25410	1
AT3G28690	2
AT4G02260	3
AT3G17155	NA
AT3G55665	NA
AT4G23440	2
AT5G65020	3
AT5G61620	3
AT5G11230	2
AT4G27490	NA
AT5G13160	3
AT4G30070	1
AT4G21500	3
AT5G66200	3
AT1G78310	3
AT3G02550	2
AT4G25700	2
AT5G56150	3
AT4G18000	3
AT3G15300	3
AT1G42980	NA
AT5G54530	2
AT1G76170	3
AT5G05440	3
AT5G46950	1
AT5G39050	3
AT5G10220	3
AT2G01980	2
AT2G28010	3
AT1G53039	NA
AT2G45840	3
AT2G20465	NA
AT4G37180	2
AT1G50490	3
AT2G04925	NA
AT5G19290	3
AT4G08949	NA
AT1G61215	NA
AT3G01040	3
AT5G58080	3
AT1G48910	3
AT5G42980	3
AT4G15900	2
AT3G20660	3
AT3G04240	3
AT1G22110	3
AT3G12970	NA
AT5G05240	NA
AT5G56780	3
AT1G68905	NA
AT4G32870	2
AT1G74870	3
AT5G19600	3
AT5G12440	3
AT2G39640	1
AT2G36724	NA
AT1G61330	1
AT1G76890	3
AT1G10745	NA
AT3G20997	NA
AT4G15560	3
AT1G67230	3
AT5G06500	1
AT4G02130	3
AT4G11660	3
AT5G58850	3
AT5G44290	3
AT5G08630	3
AT4G11990	NA
AT1G24120	3
AT3G66656	1
AT1G08065	1
AT1G14071	NA
AT3G06080	3
AT3G48160	NA
AT5G27910	3
AT3G11750	1
AT4G22910	3
AT2G29980	3
AT1G51320	1
AT1G02940	1
AT3G44950	3
AT5G03240	1
AT5G45660	NA
AT1G30400	3
AT4G30260	3
AT2G22942	NA
AT1G02580	1
AT5G41800	3
AT3G59360	3
AT3G56090	3
AT1G65300	1
AT5G27037	NA
AT3G13772	3
AT4G15735	NA
AT4G39180	3
AT2G43110	NA
AT1G14020	3
AT4G19180	NA
AT5G62260	2
AT5G24360	3
AT1G69190	1
AT5G37250	NA
AT4G30200	2
AT5G39570	3
AT3G49520	3
AT2G34990	1
AT4G14070	3
AT1G54570	3
AT5G63500	NA
AT5G27330	3
AT2G17090	1
AT2G02870	2
AT1G22200	3
AT5G54990	NA
AT3G01070	3
AT3G13620	3
AT1G30840	3
AT3G26840	3
AT5G14790	2
AT4G10490	2
AT2G38170	1
AT1G65240	2
AT2G34100	3
AT1G70300	2
AT2G37050	2
AT1G55650	NA
AT3G20290	3
AT5G10020	2
AT1G30730	3
AT5G11530	3
AT5G24355	NA
AT3G27460	NA
AT1G51690	3
AT3G24050	3
AT5G06020	1
AT4G33950	3
AT5G46960	1
AT4G15970	NA
AT1G79960	1
AT3G08600	3
AT1G71110	NA
AT4G33180	1
AT3G54320	2
AT5G42797	NA
AT1G79630	2
AT2G03936	NA
AT1G31250	NA
AT4G22115	NA
AT1G53500	2
AT5G43880	3
AT5G65890	3
AT1G50030	3
AT4G17713	NA
AT4G18140	3
AT3G17230	1
AT5G42910	3
AT1G15757	NA
AT3G11910	3
AT2G04034	NA
AT3G02885	3
AT5G24230	3
AT1G60940	2
AT5G33350	3
AT5G63120	3
AT5G57050	3
AT1G77290	NA
AT2G02490	NA
AT2G18870	NA
AT5G09490	1
AT1G11940	3
AT5G18680	3
AT5G53910	NA
AT4G39530	3
AT5G44973	NA
AT3G03855	NA
AT1G64940	1
AT1G56620	1
AT1G20250	NA
AT2G20160	1
AT3G61620	3
AT1G13680	1
AT5G56010	3
AT5G58412	NA
AT3G27835	NA
AT1G60985	1
AT3G48208	NA
AT1G53300	2
AT1G79110	3
AT1G63522	NA
AT2G44920	3
AT1G73610	1
AT5G17320	3
AT2G05335	NA
AT3G48280	NA
AT3G07810	3
AT4G36590	1
AT1G31930	2
AT4G26240	3
AT2G18650	3
AT3G19700	3
AT1G09370	1
AT2G41225	NA
AT4G39970	3
AT2G16225	NA
AT3G45955	NA
AT3G01050	NA
AT3G48300	NA
AT5G44190	2
AT3G48690	3
AT5G20150	3
AT3G12980	3
AT5G52480	1
AT1G08650	3
AT2G02820	3
AT2G25700	3
AT2G40095	NA
AT1G16430	3
AT5G10170	1
AT2G46260	3
AT5G46877	NA
AT2G28830	3
AT5G22740	2
AT4G02710	3
AT2G30480	3
AT1G19160	1
AT1G78600	3
AT3G11020	3
AT3G50060	2
AT5G61730	1
AT3G06860	3
AT2G42490	1
AT5G26630	1
AT1G17420	3
AT4G16690	2
AT1G79370	1
AT3G18440	2
AT5G20680	3
AT2G37520	3
AT4G31920	3
AT2G26990	3
AT1G67070	1
AT2G01818	NA
AT2G03913	NA
AT4G27540	2
AT3G62570	NA
AT2G15590	NA
AT5G53480	3
AT1G18773	NA
AT2G24840	3
AT3G10200	2
AT1G03230	3
AT3G12920	2
AT4G02150	2
AT1G12672	NA
AT3G45110	3
AT5G04640	3
AT5G57580	2
AT5G40450	1
AT3G61900	3
AT2G11150	3
AT5G14110	NA
AT4G39900	2
AT2G34440	3
AT5G53930	NA
AT3G24460	3
AT3G02800	3
AT4G24130	1
AT5G47520	2
AT2G27710	3
AT1G15700	3
AT1G65770	NA
AT4G14670	3
AT2G44590	3
AT5G42330	NA
AT2G23142	NA
AT5G12060	1
AT3G01331	NA
AT1G50450	3
AT3G44830	2
AT3G51160	3
AT4G26020	3
AT1G03055	3
AT1G07747	NA
AT3G17150	NA
AT2G01700	3
AT5G15000	NA
AT1G57790	3
AT3G12700	3
AT1G10670	3
AT1G20330	2
AT2G19760	3
AT1G80280	2
AT5G34940	1
AT1G09360	3
AT3G04060	2
AT2G25320	3
AT3G10290	NA
AT1G01320	2
AT5G62500	3
AT1G34650	1
AT1G62340	3
AT4G31410	3
AT1G80690	3
AT1G12670	NA
AT4G32940	2
AT1G48260	2
AT5G42232	NA
AT3G44260	3
AT3G55672	NA
AT1G19320	2
AT1G67090	3
AT3G13870	3
AT5G11000	2
AT2G28040	NA
AT5G19300	3
AT3G10870	3
AT3G20865	1
AT5G16150	2
AT2G26930	3
AT4G33840	1
AT3G13235	3
AT5G14780	2
AT3G13670	2
AT5G53250	1
AT3G01120	2
AT2G23530	3
AT5G01180	1
AT5G40720	NA
AT5G46560	3
AT2G15260	3
AT4G13690	3
AT5G13825	NA
AT4G36800	3
AT3G61177	NA
AT3G21410	1
AT3G50730	3
AT1G78230	NA
AT5G05690	1
AT4G25315	NA
AT1G51630	NA
AT3G12345	NA
AT3G16900	NA
AT5G39560	1
AT1G08720	2
AT2G40810	2
AT1G17150	1
AT1G63430	2
AT5G04220	3
AT1G44160	1
AT5G14480	NA
AT3G16310	3
AT5G58810	1
AT5G22980	1
AT5G23580	3
AT1G27600	2
AT1G05540	2
AT1G66240	2
AT4G31670	3
AT3G10985	3
AT2G42590	2
AT2G23148	NA
AT4G25380	3
AT5G45360	2
AT2G20670	1
AT2G21060	3
AT4G29220	2
AT1G23010	3
AT3G02540	2
AT5G60170	3
AT2G25800	2
AT1G78380	3
AT5G23690	2
AT4G32390	3
AT5G51480	3
AT3G17700	2
AT4G26260	1
AT1G30974	NA
AT2G19700	3
AT4G16130	3
AT5G07380	3
AT2G03730	3
AT3G50020	NA
AT2G31430	NA
AT1G65330	1
AT4G37580	2
AT3G03240	3
AT1G13755	NA
AT2G38480	3
AT4G01575	3
AT1G66050	3
AT5G23380	3
AT1G51400	2
AT2G46140	3
AT3G47543	NA
AT3G57160	1
AT5G62165	3
AT5G39040	3
AT1G71890	3
AT5G58900	2
AT1G21660	2
AT4G12570	3
AT4G27550	3
AT1G16840	2
AT5G16590	2
AT1G15045	NA
AT3G04950	NA
AT1G78560	2
AT5G56680	3
AT4G32500	3
AT3G56290	3
AT2G12190	1
AT2G38544	NA
AT3G01324	NA
AT2G28880	1
AT4G03945	NA
AT2G19510	1
AT3G03828	NA
AT1G08032	NA
AT3G03860	3
AT3G49370	3
AT2G28120	3
AT3G51460	3
AT5G18940	3
AT4G40011	NA
AT1G63180	1
AT1G12330	2
AT4G08920	2
AT1G63020	3
AT5G25270	3
AT1G78300	3
AT5G01810	3
AT1G76954	NA
AT4G01210	2
AT5G41610	3
AT4G04580	NA
AT3G45180	NA
AT1G52260	2
AT2G32750	1
AT3G24065	NA
AT3G59960	NA
AT3G59970	3
AT3G15440	3
AT5G38330	1
AT2G21420	3
AT1G24150	3
AT2G37540	1
AT2G18960	3
AT1G62422	3
AT3G09032	NA
AT2G22500	3
AT5G60440	1
AT4G30430	1
AT5G44060	3
AT2G25190	3
AT3G52800	2
AT3G13460	3
AT1G73066	NA
AT5G02490	3
AT5G41720	3
AT2G46040	3
AT5G20890	3
AT2G39960	NA
AT3G50440	2
AT5G57110	2
AT5G46320	1
AT5G21160	3
AT2G43386	NA
AT2G27500	3
AT3G45248	NA
AT1G72150	3
AT1G22015	1
AT3G19680	3
AT2G43660	1
AT3G24550	3
AT1G30740	3
AT5G65910	2
AT2G45170	2
AT1G01530	1
AT3G22180	3
AT2G03931	NA
AT5G44340	3
AT5G53870	1
AT5G40780	1
AT5G27670	2
AT1G60987	NA
AT2G31040	3
AT2G24285	NA
AT5G10410	NA
AT2G32275	NA
AT1G35670	3
AT1G32280	NA
AT5G16970	2
AT5G62910	3
AT3G59250	NA
AT1G79130	NA
AT3G24068	NA
AT1G69250	3
AT5G48590	3
AT5G39330	NA
AT3G24130	3
AT3G27290	2
AT3G44300	3
AT3G07720	2
AT4G29300	NA
AT1G28380	3
AT1G09160	3
AT4G36810	3
AT4G17870	3
AT2G44330	NA
AT5G23530	3
AT1G02965	NA
AT4G00900	2
AT5G40900	NA
AT4G23750	2
AT1G68160	3
AT4G31340	2
AT5G54210	NA
AT4G33985	3
AT3G44090	NA
AT5G63610	3
AT5G52660	2
AT1G57680	2
AT2G04033	NA
AT5G49448	NA
AT4G33150	2
AT4G03550	3
AT2G17990	3
AT2G47820	2
AT3G60140	1
AT4G32840	2
AT4G28480	2
AT5G26570	2
AT5G63087	NA
AT1G70060	3
AT2G45830	2
AT3G20740	3
AT2G45540	2
AT2G18420	1
AT3G62380	3
AT2G20208	NA
AT4G31880	3
AT5G61190	2
AT1G32110	NA
AT3G55410	3
AT1G09070	3
AT3G57550	3
AT3G04670	2
AT1G53280	2
AT4G32080	1
AT1G11110	NA
AT4G16600	1
AT3G11920	1
AT2G18950	3
AT4G25320	3
AT1G24650	3
AT1G17110	2
AT1G60880	NA
AT3G48231	NA
AT5G19180	3
AT5G07675	NA
AT2G26730	2
AT5G38450	3
AT5G15560	3
AT3G05380	NA
AT1G11380	3
AT3G28180	2
AT1G76090	1
AT5G21130	3
AT3G44730	2
AT5G19172	NA
AT1G03200	2
AT5G12900	3
AT1G49640	NA
AT3G46600	3
AT1G52540	2
AT3G01329	NA
AT2G22420	3
AT3G06620	2
AT5G48970	3
AT4G32290	2
AT3G48180	NA
AT3G24927	NA
AT3G26940	1
AT5G10230	1
AT4G14430	3
AT2G23900	1
AT2G03955	NA
AT5G09360	3
AT4G39540	3
AT3G10780	1
AT1G49660	3
AT3G01328	NA
AT5G42850	3
AT5G64020	NA
AT2G35230	3
AT3G16960	3
AT4G40080	3
AT5G10200	NA
AT3G55252	NA
AT4G33300	2
AT2G31750	1
AT1G67740	3
AT4G08530	2
AT2G42880	3
AT5G15950	3
AT4G17860	3
AT1G21000	3
AT5G17160	3
AT3G14200	2
AT3G53900	3
AT1G47960	2
AT3G05880	3
AT3G58040	3
AT3G25240	NA
AT2G24693	NA
AT3G17250	3
AT5G38470	3
AT4G05370	3
AT2G40570	3
AT1G20630	3
AT3G12840	3
AT5G45100	NA
AT3G50810	3
AT3G10370	3
AT1G62970	2
AT4G12550	1
AT5G58820	1
AT3G18470	NA
AT5G19510	3
AT1G80330	3
AT3G01323	NA
AT5G37600	3
AT3G11210	1
AT4G39860	3
AT1G55190	3
AT1G26580	2
AT1G15060	3
AT3G12820	1
AT1G06050	3
AT5G17020	3
AT1G55050	3
AT1G68907	NA
AT4G38680	3
AT3G05500	2
AT5G23920	3
AT1G22210	1
AT4G18020	3
AT1G04555	NA
AT1G54160	3
AT1G54280	1
AT4G31130	3
AT1G66360	2
AT5G21125	NA
AT4G38960	3
AT4G23450	3
AT2G19400	3
AT1G08820	NA
AT2G33780	NA
AT5G35630	1
AT3G47940	3
AT1G23480	1
AT5G24890	2
AT3G25420	1
AT5G23150	2
AT3G24510	1
AT3G12570	3
AT4G35750	2
AT1G23870	3
AT4G35589	NA
AT1G77840	3
AT2G22790	NA
AT4G15755	1
AT5G61390	NA
AT1G74000	1
AT1G64280	3
AT2G36695	NA
AT4G32790	NA
AT4G22745	NA
AT5G23210	1
AT1G10020	2
AT5G18290	2
AT1G49435	NA
AT1G22730	2
AT5G28840	2
AT1G36000	1
AT1G28520	2
AT3G02880	3
AT1G60970	2
AT4G31750	3
AT5G60620	3
AT5G16470	3
AT5G03555	3
AT5G09730	1
AT2G44450	3
AT3G51290	2
AT4G12000	2
AT4G35550	2
AT5G25900	3
AT5G24790	NA
AT5G07850	1
AT4G38700	1
AT2G37060	NA
AT2G25185	NA
AT5G62530	2
AT1G14455	NA
AT3G10040	2
AT3G51770	3
AT3G02470	2
AT5G20100	NA
AT3G04735	NA
AT2G41475	NA
AT2G17750	3
AT1G06700	2
AT5G41340	2
AT5G12043	NA
AT3G55380	3
AT2G02515	1
AT1G49720	3
AT3G02670	1
AT1G17190	3
AT2G32410	3
AT4G25470	3
AT4G35725	1
AT4G05530	3
AT1G54410	3
AT5G44910	3
AT1G14580	2
AT5G42223	NA
AT1G75840	3
AT4G19450	2
AT1G21070	3
AT3G12620	3
AT4G40020	1
AT4G18700	3
AT3G46860	1
AT1G12665	NA
AT2G27830	3
AT1G09500	2
AT3G57230	2
AT5G19175	NA
AT5G27600	3
AT1G14330	3
AT1G50950	1
AT3G54880	NA
AT2G17370	3
AT3G15030	3
AT4G19020	NA
AT4G37110	3
AT5G16110	3
AT1G23170	NA
AT3G06810	3
AT5G24000	3
AT4G24480	3
AT1G69818	NA
AT4G22770	2
AT1G56560	3
AT4G02600	1
AT1G76670	2
AT5G25580	2
AT5G50490	NA
AT1G77990	3
AT1G14210	3
AT4G00570	3
AT3G07560	3
AT1G74010	1
AT4G27800	2
AT1G25540	3
AT2G19480	3
AT2G34555	3
AT5G16480	3
AT1G77960	NA
AT4G39917	NA
AT2G33150	3
AT5G46710	2
AT1G18720	3
AT4G35733	NA
AT1G05030	3
AT2G42010	3
AT2G30810	1
AT4G34900	3
AT5G03040	2
AT3G20420	3
AT5G48180	2
AT5G28000	NA
AT1G69260	3
AT4G25900	1
AT5G55550	2
AT1G24180	3
AT5G57640	NA
AT5G42250	3
AT5G45650	1
AT1G77220	3
AT5G39990	3
AT2G33160	3
AT5G42890	3
AT1G80950	3
AT1G62530	2
AT3G20260	2
AT5G19980	3
AT4G35590	2
AT1G30820	3
AT3G27503	NA
AT1G59710	2
AT1G08190	3
AT1G03730	3
AT3G48760	3
AT4G14880	3
AT2G22720	3
AT3G51980	NA
AT1G69840	1
AT5G23680	3
AT2G04675	3
AT4G22780	3
AT2G27936	NA
AT5G52330	3
AT2G30970	3
AT3G52720	3
AT3G17420	3
AT5G42640	1
AT3G12810	2
AT3G59110	2
AT2G20740	3
AT4G30630	3
AT3G02870	3
AT1G77932	NA
AT5G57000	3
AT1G11960	3
AT5G47620	3
AT3G10380	3
AT4G16810	NA
AT1G15750	3
AT1G79000	2
AT1G10650	2
AT2G48020	1
AT1G30210	3
AT3G61070	3
AT1G32540	3
AT5G57570	3
AT3G56680	3
AT3G13110	3
AT4G37240	3
AT4G34000	1
AT5G57740	3
AT3G66652	2
AT5G58560	3
AT4G37610	1
AT1G15380	1
AT4G37690	NA
AT1G69825	NA
AT4G08039	NA
AT5G15260	NA
AT1G22760	1
AT2G42670	3
AT5G39640	3
AT5G20260	NA
AT1G18370	2
AT1G51140	3
AT5G55508	NA
AT3G55560	3
AT1G20967	NA
AT5G62120	1
AT5G54220	1
AT5G55010	3
AT5G41471	NA
AT4G25386	NA
AT3G02390	3
AT1G30810	3
AT1G04320	NA
AT1G71040	3
AT5G08075	NA
AT4G19420	3
AT1G19330	2
AT5G48850	2
AT1G01020	NA
AT5G12850	2
AT2G18250	2
AT5G66920	2
AT5G52450	3
AT4G33980	3
AT5G01490	3
AT3G27210	3
AT2G46308	NA
AT3G43730	3
AT1G07051	NA
